# Supplementary material for: Mussel-inspired injectable chitosan hydrogel modified with catechol for cell adhesion and cartilage defect repair
Source: Royal Society of Chemistry journal article supplement (doi:10.1039/d1tb02241e), 2021-12-22
Supplement: d1tb02241e1.pdf [file d1tb02241e1.pdf]

Table S1 Gelation time of CS-C hydrogel with different concentration of CS-C macromolecule

|   | CS-C<br>(wt%) | H <sub>2</sub> O <sub>2</sub><br>(wt%) | HRP<br>(wt%) | Gelation time<br>(s) |
|---|---------------|----------------------------------------|--------------|----------------------|
| 1 | 1.50          | 0.06                                   | 0.004        | 266s                 |
| 2 | 1.75          | 0.06                                   | 0.004        | 160s                 |
| 3 | 2.00          | 0.06                                   | 0.004        | 127s                 |

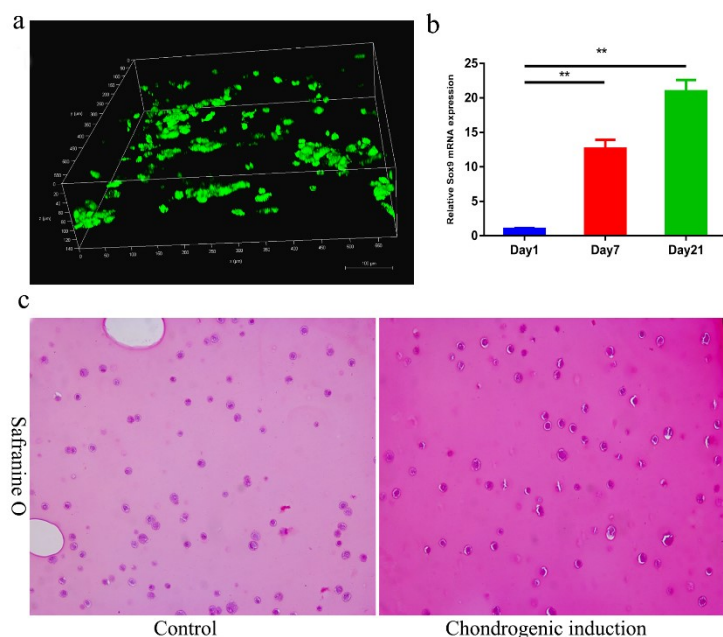

**Fig. S1** Chondrogenic induction of BMSC loaded in CS-C hydrogel. (a) The cell viability was detected by Calcein/PI cell activity and cytotoxicity test kit after BMSC loaded in CS-C hydrogel for 4 days. (b) Gene expression of Sox9 after BMSC loaded in CS-C hydrogel. (c) Safranin O staining of BMSC loaded in CS-C hydrogel and chondrogenic induction for 21 days. Control group: BMSC loaded in CS-C hydrogel without chondrogenic medium. Chondrogenic induction group: BMSC loaded in CS-C hydrogel with chondrogenic medium.

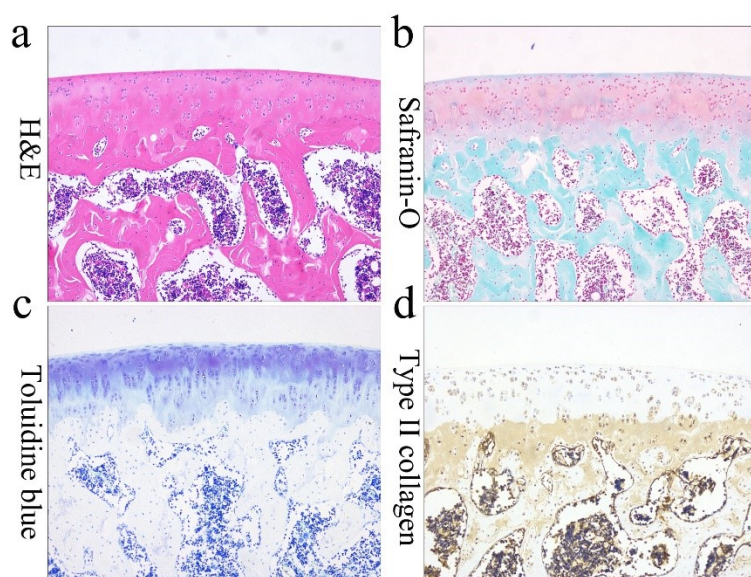

**Fig. S2** Histological staining of the native articular cartilage. (a) hematoxylin and eosin. (b) Safranin-O. (c) toluidine blue (d) COL II immunohistochemical staining.
